# Supplementary material for: Nontuberculous Mycobacterium Infection in Kidney Transplant Recipients: A Single Center Experience From North India
Source: Research Square preprint supplement (doi:10.21203/rs.3.rs-3660001/v1), 2023-12-02
Supplement: Supplementary file 1 [file 643af6cb878f4643cdbe7f1e.pdf]

| Pat No | Age at Tx | Sex | Weight at diag | baseline creat | CKD cause   | Baseline IS | induction      | ABOi |
|--------|-----------|-----|----------------|----------------|-------------|-------------|----------------|------|
| 1      | 21        | f   | 55             | 0.8            | CGN         | TMP         | Ritux/Basilixi | 1    |
| 2      | 31        | m   | 64             | 0.9            | CGN         | TMP         | Basilixi       | 0    |
| 3      | 35        | m   | 60             | 0.8            | CGN<br>IgAN | CMP         | rATG           | 0    |
| 4      | 19        | m   | 57             | 1.5            | IgAN        | TMP         | rATG           | 0    |
| 5      | 23        | m   | 60             | 0.8            | FSGS        | TMP         | Ritux/Basilixi | 1    |
| 6      | 32        | m   | 60             | 0.9            |             | TMP         | Basilixi       | 0    |

| HLA<br>incomp | donor | organ<br>inv | site inv       | Age at<br>diag | Creat at<br>diagnosis<br>(mg/dL) | precedi<br>ng<br>infectio<br>ns | Precedi<br>ng<br>rejectio<br>n | Rejectio<br>n type |
|---------------|-------|--------------|----------------|----------------|----------------------------------|---------------------------------|--------------------------------|--------------------|
| 3             | M     | SC           | Leg            | 23             | 1.8                              | nil                             | 1                              | TCMR               |
| 3             | M     | LN           | Cervical<br>LN | 34             | 1.6                              | CMV                             | 1                              | TCMR               |
| 6             | DD    | SC           | suture         | 35             | 1.1                              | nil                             | 0                              | nil                |
| 6             | DD    | SC           | suture         | 19             | 0.8                              | nil                             | 0                              | nil                |
| 3             | M     | Perit        | Ascites        | 27             | 3.4                              | nil                             | 1                              | TCMR+<br>ABMR      |
| 5             | W     | SC           | foot           | 40             | 4.8                              | nil                             | 1                              | TCMR+<br>ABMR      |

| <b>dur<br/>from Tx</b> | <b>Dur<br/>from<br/>Rejection</b> | <b>Diag<br/>from<br/>sympt<br/>(da</b> | <b>ZN</b> | <b>GeneXp<br/>ert</b> | <b>NTM<br/>species<br/>grown</b> | <b>Tac<br/>dose/d</b> | <b>Tac<br/>Dose<br/>(mg/kg/<br/>d)</b> | <b>Tac C0<br/>(ng/ml)</b> |
|------------------------|-----------------------------------|----------------------------------------|-----------|-----------------------|----------------------------------|-----------------------|----------------------------------------|---------------------------|
| 20                     | 17                                | 28                                     | 1         | 0                     | Chelona<br>e                     | 3                     | 0.054                                  | 6.1                       |
| 28                     | 26                                | 24                                     | 1         | 0                     | Fortuitu<br>m                    | 4                     | 0.062                                  | 7.9                       |
| 4                      | nil                               | 26                                     | 1         | 0                     | Chenlon<br>ae                    |                       |                                        |                           |
| 4                      | nil                               | 32                                     | 1         | 0                     | chelona<br>e                     | 5                     | 0.087                                  | 7.98                      |
| 40                     | 40                                | 30                                     | 1         | 0                     | Abscess<br>us                    | 2                     | 0.033                                  | 5.2                       |
| 113                    | 36                                | 22                                     | 1         | 0                     | Abscess<br>us                    | 3                     | 0.05                                   | 4.7                       |

| CsA dose (mg/kg/d) | CsA C0 (ng/ml) | MMF dose (mg/kg/d) | anti-rejection             | rATG dose (mg) | rATG Dose (mg/kg) | Treatment       | Change      | MPA reduction |
|--------------------|----------------|--------------------|----------------------------|----------------|-------------------|-----------------|-------------|---------------|
|                    |                | 36.35              | rATG                       | 325            | 5.9               | Clar+Line+Mero  | nil         | 50%           |
|                    |                | 31.25              | rATG                       | 400            | 6.25              | Amika+Clar+Levo | nil         | 75%           |
| 300                | 215            | 33.3               | nil                        | 250            | 4.16              | Amika+Clar+Line | nil         | 75%           |
|                    |                | 35.08              | nil                        | 250            | 4.38              | Amika+Clar+Line | nil         | 75%           |
|                    |                | 33.3               | rATG+P<br>P+IVIg+<br>Ritux | 350            | 5.8               | Amika+Clar      | Mero+Ci pro | Stop          |
|                    |                | 33.3               | rATG+P<br>P+IVIg+<br>Ritux | 350            | 5.8               | Amika+Clar      | Mero+Ci pro | Stop          |

| Tac/Cs<br>A reduce | response | dur of<br>Treatme<br>nt(wk) | Rejectio<br>n<br>during<br>treatme<br>nt | Renal<br>outcom<br>e |
|--------------------|----------|-----------------------------|------------------------------------------|----------------------|
| no                 | good     | 16                          | 0                                        | stable               |
| no                 | good     | 32                          | 0                                        | stable               |
| Yes                | good     | 16                          | 0                                        | stable               |
| no                 | good     | 16                          | 0                                        | stable               |
| Yes                | good     | 24                          | 0                                        | Dialysis             |
| Yes                | good     | 24                          | 0                                        | Dialysis             |
